1 Stratified Linkage Disequilibrium Score Regression reveals enrichment of eQTL effects  
2 on complex traits is not tissue specific

3

#### 4 **Authors**

5 Hill F. Ip,<sup>1\*</sup> Rick Jansen,<sup>2</sup> Abdel Abdellaoui,<sup>1</sup> Meike Bartels,<sup>1,3,4</sup> , UK Brain Expression Consortium,

6 Dorret I. Boomsma,<sup>1,3,4</sup> & Michel G. Nivard<sup>1\*\*</sup>

7

#### 8 **Affiliations**

9 <sup>1</sup> Department of Biological Psychology, Vrije Universiteit Amsterdam, the Netherlands

10 <sup>2</sup> Department of Psychiatry, VU University Medical Center, Amsterdam, the Netherlands

11 <sup>3</sup> Amsterdam Public Health Research Institute, Amsterdam, the Netherlands

12 <sup>4</sup> Neuroscience Amsterdam, the Netherlands

13

#### 14 **Corresponding authors**

15 \* [h.f.ip@vu.nl](mailto:h.f.ip@vu.nl)

16 \*\* [m.g.nivard@vu.nl](mailto:m.g.nivard@vu.nl)

17

18

19

20

21

22

23

## 24 **Abstract**

25 Both gene expression levels and eQTLs (expression quantitative trait loci) are partially tissue-specific,  
26 complicating the detection of eQTLs in tissues with limited sample availability, such as the brain.  
27 However, eQTL overlap between tissues might be non-trivial, allowing for inference of eQTL  
28 functioning in the brain via eQTLs measured in readily accessible tissues, e.g. whole blood. Using  
29 Stratified Linkage Disequilibrium Score Regression (SLDSR), we quantify the enrichment in GWAS  
30 signal of blood and brain eQTLs in genome-wide association study (GWAS) for three brain-related  
31 (schizophrenia, BMI, and educational attainment), three immune-related traits (Crohn's disease,  
32 rheumatoid arthritis, and ulcerative colitis), and five traits not strongly associated with either tissue  
33 (age at menarche, coronary artery disease, height, LDL levels, and smoking behavior). Our analyses  
34 established significant enrichment of blood and brain eQTLs in their effects across all traits. As we do  
35 not know the true number of causal eQTLs, it is difficult to determine the precise magnitude of  
36 enrichment. We found no evidence for tissue-specific enrichment in GWAS signal for either eQTLs  
37 uniquely seen in the brain or whole blood. To follow up on our findings, we tested tissue-specific  
38 enrichment of eQTLs discovered in 44 tissues by the Genotype-Tissue Expression (GTEx) consortium,  
39 and, again, found no tissue-specific eQTL effects. Finally, we integrated the GTEx eQTLs with SNPs  
40 associated with tissue-specific histone modifiers, and interrogated its effect on rheumatoid arthritis  
41 and schizophrenia. We observed substantially enriched effects on schizophrenia, though again not  
42 tissue-specific. We conclude that, while eQTLs are strongly enriched in GWAS signal, the enrichment  
43 is not specific to the tissue used in eQTL discovery. Therefore, working with relatively accessible  
44 tissues, such as whole blood, as proxy for eQTL discovery is sensible and restricting lookups for  
45 GWAS hits to a specific tissue might not be advisable.

46

## 47 **Key words**

48 eQTL; gene expression; tissue-specificity; complex traits; enrichment; genome-wide; brain; whole  
49 blood; stratified linkage disequilibrium score regression; SLDSR; eQTL discovery

50

## 51 **Introduction**

52 The aim of genome-wide association studies (GWAS) is to detect statistically significant associations  
53 between genetic variants, such as single nucleotide polymorphisms (SNPs), and a trait of interest  
54 (Hirschhorn and Daly 2005). GWAS have identified many genetic variants and thereby provided  
55 insights into the genetic architecture of complex traits (Hirschhorn and Daly 2005; Visscher et al.  
56 2012). However, a large number of variants identified through GWAS are located outside of coding  
57 regions and specific knowledge of regulatory elements is limited (Lowe and Reddy 2015). Therefore,  
58 uncovering a relationship between GWAS hits and biological function has proven to be complicated  
59 (Lowe and Reddy 2015). Expression quantitative trait loci (eQTLs) contain SNPs that influence gene  
60 expression, and are not necessarily located in coding regions. eQTLs may aid functional annotation  
61 of SNPs that have been identified in a GWAS and are located outside of coding regions (Morley et al.  
62 2004; Lowe and Reddy 2015). Previous work has found substantial enrichment of eQTLs among  
63 GWAS hits (Manolio et al. 2009; Nicolae et al. 2010; Torres et al. 2014) and an enrichment in their  
64 genome-wide effect on complex traits (Davis et al. 2013). Therefore, eQTLs are viewed as an  
65 important tool in moving from genome-wide association to biological interpretation.

66 As a result of differences in gene expression between cells originating from different tissues,  
67 eQTLs are potentially tissue-specific (Hernandez et al. 2012; GTEx Consortium 2015). Tissue-  
68 specificity poses no problem if the tissue of interest is readily available for research, such as whole  
69 blood. However, discovery of eQTLs gets complicated when measurement of expression levels in a  
70 tissue is limited by ethical and practical considerations, for example in brain tissue. Several studies  
71 have shown that the overlap between eQTLs from different tissues might actually be larger than  
72 initially assumed (Ding et al. 2010; Nica et al. 2011). The Genotype-Tissue Expression (GTEx)  
73 consortium identified eQTLs in a wide range of human tissues and showed that 54-90% of the eQTLs

74 identified in one tissue are also designated as an eQTL in at least one other tissue (GTEx Consortium  
75 2015; Aguet et al. 2016). In another study, Liu *et al* (2016) found a high average pairwise genetic  
76 correlation ( $r_g=0.738$ ) of local gene expression between tissues. Nevertheless, small differences in  
77 terms of eQTL effect may be of considerable importance in terms of the effect an eQTL might have  
78 on complex traits related to specific tissues. It is, therefore, worthwhile to investigate the specific  
79 utility of tissue-specific eQTLs in their effect on complex traits, as studied in GWAS, as the discovery  
80 of eQTLs for tissues such as the brain might be advanced by eQTLs discovered in more accessible  
81 tissues, such as whole blood. The use of accessible tissues, though, depends on a substantial degree  
82 of similarity of eQTL effect across tissue, and to what extent eQTL differences between tissues are  
83 important in complex trait etiology.

84 Stratified Linkage Disequilibrium Score Regression (SLDSR) is a technique that estimates the  
85 SNP-heritability ( $h^2_{SNP}$ ) of a trait based on GWAS summary statistics (Bulik-Sullivan et al. 2015;  
86 Finucane et al. 2015). By simultaneously analyzing multiple categories of SNPs (annotations), SLDSR  
87 can partition  $h^2_{SNP}$  by annotation ( $h^2_{annot}$ ) and thereby provides a way to jointly quantify the  
88 enrichment in GWAS signal of several annotations. Here, we extend SLDSR by including annotations  
89 containing *cis*-eQTLs, i.e. eQTLs located closely to the gene with which they associate (Brem et al.  
90 2002; Ramasamy et al. 2014), discovered in multiple tissues. To this end, we perform analyses based  
91 on representative eQTL resources, and consider a variety of traits as outcomes.

92 Firstly, we selected all eQTLs per gene discovered in large samples of RNA expression levels  
93 assessed in whole blood (N=4896)(Wright et al. 2014; Jansen et al. 2017) and in brain tissues (N=134)  
94 (Ramasamy et al. 2014), and quantified the contribution of these blood and brain eQTLs to the  
95 genetic variance in complex traits captured in GWAS. We then estimated tissue-specific eQTL effects  
96 on complex traits by quantifying the enrichments of eQTLs uniquely found in whole blood or  
97 uniquely found in brain, conditional on the enrichment of the complete blood eQTL annotation or  
98 complete brain eQTL annotation, respectively. We considered the effect of eQTLs on three brain-  
99 related phenotypes: schizophrenia, BMI, and educational attainment; three immune disorders:

100 Crohn's disease, rheumatoid arthritis, and ulcerative colitis; and five other complex traits and  
101 disorders: age at menarche, coronary artery disease, height, LDL levels, and smoking behavior.

102 Secondly, we retrieved all eQTLs identified in any of the 44 tissues from the GTEx consortium  
103 (N=70-361, median=126.5)(GTEx Consortium 2015; Aguet et al. 2016). We considered the  
104 enrichment in GWAS signal of the union of all GTEx eQTLs, and, additionally, the enrichment of  
105 tissue-specific eQTL effects on top of the union of all GTEx eQTLs. We expected to observe tissue-  
106 specific enrichment of eQTLs in their effects on complex traits related to the tissue in question, e.g.  
107 eQTLs discovered in immune-related tissues are expected to show higher enrichments in their effect  
108 on immune-related traits compared to eQTLs found in skin tissue. We considered tissue-specific  
109 enrichment of *cis*-eQTLs in their effect on schizophrenia (a disorder where there is strong prior  
110 evidence for the involvement of processes in the brain) and rheumatoid arthritis (a disease with  
111 strong prior evidence for the involvement of processes in the immune system) as GWAS for these  
112 traits are well powered for extended LD-score-based analyses. We further considered the  
113 enrichment of the intersection of *cis*-eQTLs discovered in any tissue, and histone modification in a  
114 specific tissue (i.e. tissue-specific epigenetically changed chromatin states in regulatory regions).

115 Our analyses were designed to elucidate the relation between eQTLs and complex traits, and  
116 to quantify the extent to which this relation is dependent on the tissue used in eQTL discovery. Our  
117 analysis further considered the enrichment of genomic regions related to gene expression and  
118 epigenetically modified in specific tissues.

119

## 120 **Material and Methods**

### 121 **SLDSR method**

122 A measure of linkage disequilibrium (LD) for each SNP, called an "LD score", can be computed by  
123 taking the sum of correlations between that SNP and all neighboring SNPs (Bulik-Sullivan et al. 2015;  
124 Finucane et al. 2015). Under a polygenic model, LD scores are expected to show a linear relationship  
125 with GWAS test statistics of corresponding SNPs, where the slope is proportional to  $h^2_{\text{SNP}}$ . For SLDSR,

126 LD scores are based on only (functional) parts of the genome and used as predictors in a multiple  
127 linear regression (Finucane et al. 2015). In this manner, SLDSR is able to partition  $h^2_{\text{SNP}}$  into parts that  
128 are explained by these parts of the genome (i.e.  $h^2_{\text{annot}}$ ), while accounting for influences of the  
129 remaining annotations in the model. The enrichment of an annotation is then obtained by taking the  
130 ratio of  $h^2_{\text{annot}}$  over the proportion of SNPs that fall within that annotation. For eQTLs, the  
131 denominator, i.e. the number of SNPs in the annotation, is a complicated quantity: not all significant  
132 eQTLs are likely causal; whereas including only lead, or putative causal, eQTLs may result in very  
133 small annotations located near genes and other regulatory elements, which presents a risk of  
134 inflated estimates of the enrichment in GWAS signal. Because of these issues, we consider all  
135 significant *cis*-eQTLs as an annotation, and retain additional gene-centric and regulatory annotations  
136 in the model.

137

### 138 **Target traits**

139 As outcome for SLDSR, we used summary statistics of GWAS on Crohn's disease (Jostins et al. 2012),  
140 rheumatoid arthritis (Okada et al. 2014), ulcerative colitis (Jostins et al. 2012), BMI (Speliotes et al.  
141 2010), educational attainment (Rietveld et al. 2013), schizophrenia (Ripke et al. 2014), age at  
142 menarche (Perry et al. 2014), coronary artery disease (Schunkert et al. 2011), height (Allen et al.  
143 2010), LDL levels (Teslovich et al. 2010), and smoking behavior (Furberg et al. 2010). The first three  
144 traits were chosen because these are related to the immune system and are therefore expected to  
145 reveal considerable enrichment of blood eQTL signal (Jostins et al. 2012; Okada et al. 2014). Similarly,  
146 brain eQTLs are expected to show substantial enriched effects due to previous reports on the  
147 involvement of the central nervous system (CNS) in schizophrenia (Ripke et al. 2014), educational  
148 attainment (Rietveld et al. 2013), and BMI (Vimalaswaran et al. 2012). Of course, these traits do not  
149 perfectly align with either tissue, e.g. the immune system has been implicated in the etiology of  
150 schizophrenia (Andreassen et al. 2015) and BMI (Karalis et al. 2009), and might therefore also be  
151 enriched in their effects for the other eQTL set. However, this is expected to occur at lower rates.

152 Enrichment of blood and brain eQTL effects on the remaining traits was calculated to contrast the  
153 results with traits for which we do not have a strong *a priori* expectation of the relationship between  
154 trait and tissue.

155 The discovery sample for detection of blood eQTLs (Wright et al. 2014; Jansen et al. 2017)  
156 included participants from the Netherlands Twin Register (NTR)(Boomsma et al. 2008; Ripke et al.  
157 2013) and Netherlands Study of Depression and Anxiety (NESDA)(Penninx et al. 2008). Subjects from  
158 these studies, not necessarily the same ones, also participated in the GWAS for some of the traits  
159 examined (Allen et al. 2010; Speliotes et al. 2010; Teslovich et al. 2010; Furberg et al. 2010; Rietveld  
160 et al. 2013; Perry et al. 2014). To ensure that the discovery sample did not affect estimates of  
161 enrichments of eQTL effects in the various GWAS signals, we looked at trait-specific enrichment of  
162 blood and brain eQTL signal in GWAS signal for educational attainment and smoking behavior. We  
163 compared the results from using publicly available datasets with using summary statistics based on  
164 the same sample without subjects from the NTR or NESDA. The results did not reveal appreciable  
165 differences between the respective datasets for educational attainment, but did show substantial  
166 differences for smoking behavior (S1 Figure). This latter finding could conceivably be a function of  
167 relatively strong effects of smoking behavior on gene expression levels (Vink et al. 2015). Therefore,  
168 the remaining analyses for smoking behavior were performed using the summary statistics without  
169 participants from NTR or NESDA, whereas analyses for the other traits (age at menarche, BMI,  
170 educational attainment, height, and LDL level) were run using publicly available summary statistics.

171

## 172 **Blood and brain eQTL enrichment**

173 A catalog of whole blood *cis*-eQTLs was obtained from Jansen *et al* (2017; Wright et al. 2014), where  
174 all eQTLs significantly associated with gene expression in whole blood for each probe set were  
175 selected for inclusion in our whole blood eQTL annotation. A list of brain eQTLs was obtained from  
176 the UK brain expression consortium (UKBEC), for which the analyses are described in Ramasamy *et al*  
177 (2014). We based the brain eQTL annotation on SNPs that were significantly associated with the

178 average gene expression across 12 brain regions. SLDSR annotations were constructed as per the  
179 instructions in Bulik-Sullivan et al. and Finucane et al. (2015). To guard against upward bias in the  
180 eQTL enrichment signal, two extra annotations containing SNPs within a 500 base pair (bp) and  
181 100bp window around any eQTL were constructed for each eQTL set (Finucane et al. 2015). Finally,  
182 to ensure that the enrichment of eQTL effects in GWAS signal was not in fact caused by their  
183 proximity to the genes they influence, an additional gene centric annotation was computed, which  
184 contained all genes for which eQTLs were included.

185

### 186 **Tissue-specific eQTL enrichment**

187 To distinguish between the effects of blood- and brain-specific eQTLs, we split each annotation into  
188 two sets based on the overlap in genes that were tagged by eQTLs from both tissue. That is, the  
189 brain eQTL annotation was split into an annotation of brain eQTLs which regulate genes for which  
190 also at least one blood eQTL was found, and a second annotation of eQTLs that tagged genes for  
191 which only brain eQTLs were found. Likewise, the blood eQTL annotation was split into an  
192 annotation containing only eQTLs that tagged genes for which eQTLs from both tissue was found,  
193 and an annotation consisting of blood eQTLs that tagged genes for which only eQTLs have been  
194 found in blood.

195

### 196 **Enrichment of eQTLs from 44 tissues**

197 There are limitations to above mentioned analyses of tissue-specific enrichments of eQTL effects in  
198 GWAS signal. The eQTLs are obtained from two different projects, which vary in terms of sample size  
199 and their definition of an eQTL. To mitigate the heterogeneity between studies, and to extend to  
200 additional tissues. We performed additional analyses using eQTLs obtained by a common pipeline  
201 from 44 tissues (see S2 Table) and based on a broader eQTL locus definition (GTEx Consortium 2015;  
202 Aguet et al. 2016). For each of the 44 tissues, we created annotations for analysis in SLDSR following  
203 the previously described procedure. Analogous to the procedure of Finucane *et al* (2015) for cell-



204 type-specific analysis using SLDSR, we additionally created an annotation that contained all GTEx  
205 eQTLs, i.e. a SNP would be included in this annotation if it was designated as part of at least one of  
206 the 44 tissue-specific GTEx annotations, and added a 100bp and 500bp window. No windows were  
207 specified for the tissue-specific GTEx annotations. Using GWAS summary statistics for schizophrenia,  
208 we then ran one SLDSR model containing only the baseline categories and the union of GTEx eQTLs,  
209 and 44 additional models with the two previous annotations and one of the tissue-specific GTEx  
210 annotations at a time. We repeated the procedure using summary statistics for rheumatoid arthritis.

211 GTEx has relative small sample sizes for the brain eQTL discovery (mean=89 sample size,  
212 range=72-103) compared to other tissues (mean=160 sample size, range=70-361) (GTEx Consortium  
213 2015; Aguet et al. 2016). To investigate the effect of differences in sample size on estimates of  
214 enrichments in GWAS signal, we collapsed the union of individual brain eQTL annotations into a  
215 shared brain eQTL annotation (i.e. an eQTL found in at least one of the GTEx brain annotations was  
216 included in the shared brain eQTL annotation). This annotation was then analyzed as an additional  
217 GTEx eQTL annotation. We further tested the relationship between tissue sample size and tissue  
218 eQTL enrichment.

219

## 220 **Enrichment of the intersection between eQTLs and histone marks**

221 The availability of annotations based on tissue-specific histone marks made it possible to create an  
222 annotation that represents the intersection between eQTLs and this type of epigenetic modification  
223 related to enhancers and promoters of actively transcribed genes. We obtained LD score  
224 annotations of SNPs in regions that bare histone marks in cells from the CNS or immune system from  
225 Finucane *et al* (2015). Out of the 220 cell-type-specific histone mark that were available, 101 were  
226 found in the CNS or immune tissues. For each of the 101 annotations of SNPs in cell-type-specific  
227 histone marks, we extracted its intersection with the union of GTEx eQTLs and made a new  
228 annotation of eQTLs which intersected with histone marks (i.e. SNPs found in both annotations). We  
229 then analyzed each of the intersection annotations individually in a model together with the baseline

230 categories, the union of GTEx eQTLs, and the corresponding cell-type-specific histone marks.  
231 Enrichments in GWAS signal of the intersection should be interpreted as enrichment of genome-  
232 wide SNP effects on a complex trait beyond the additive effects which work on all SNPs that are a  
233 *cis*-eQTL and histone mark in question. In fact, we test whether the interaction between tissue-  
234 specific chromatin state and eQTLs are enriched in their genome-wide effect on complex traits.

235

## 236 **Results**

### 237 **Blood and brain eQTL enrichment**

238 We fitted an SLDSR model containing the baseline categories; the complete annotation for both  
239 brain and blood eQTL tissues, their 100 and 500bp windows, and gene-centric annotations to all  
240 traits (Crohn's disease, rheumatoid arthritis, ulcerative colitis, BMI, educational attainment,  
241 schizophrenia, age at menarche, coronary artery disease, height, LDL levels, and smoking behavior).  
242 We found significant effects of brain eQTLs on educational attainment, rheumatoid arthritis,  
243 smoking behavior, and schizophrenia, and significant effect of blood eQTLs on height and smoking  
244 behavior (see S3 Table). We then meta-analyzed the results for all annotations, both in the baseline  
245 model, and those associated with eQTLs across the 11 traits. Our analyses revealed significant effect  
246 of both blood ( $p < 0.001$ ) and brain ( $p < 0.001$ ) eQTL effects on all traits (Figure 1, S4 Table),  
247 exceeding, in terms of significance, all the baseline categories considered by Finucane *et al* (2015)  
248 but conserved genomic regions. The gene-centric annotation for both blood and brain eQTLs showed  
249 no effect on any trait. We further observed no evidence for depletion of blood-specific eQTLs  
250 (relative to all blood eQTLs) on brain-related traits, nor do we find significant depletion of effect on  
251 immune-related traits of eQTLs associated with genes for which eQTLs were solely identified in brain  
252 tissue (Table I).

253

### 254 **Enrichment of eQTLs from 44 tissues in GTEx**

255 We interrogated the enrichment of the union of GTEx eQTLs and 44 tissue-specific GTEx annotations  
256 in their effect on schizophrenia and rheumatoid arthritis. Figure 2 shows the coefficient Z-scores of  
257 the 45 GTEx annotations, sorted from largest to smallest. In both cases, the union of GTEx eQTLs had  
258 a substantial Z-score ( $Z=5.501$  and  $Z=3.802$  for schizophrenia and rheumatoid arthritis, respectively,  
259 both  $p<0.001$ , S5 Table), indicating that eQTLs were significantly enriched in their effects on complex  
260 traits. The tissue-specific annotations, however, performed notably worse and in some cases even  
261 suggested depletion of genome-wide effects of tissue-specific eQTLs on schizophrenia and  
262 rheumatoid arthritis. For rheumatoid arthritis, the coefficient Z-scores of the whole blood  
263 annotation reached nominal significance ( $Z=2.036$ ,  $p=0.021$ ), but failed correction for multiple  
264 testing. None of the other annotations reached nominal significance. The union of all GTEx brain  
265 annotations did not contribute significantly to explaining  $h^2_{\text{SNP}}$  ( $Z=0.147$ ,  $p=0.441$ ). Sample size in the  
266 eQTL discovery phase appears to be a strong determinant of tissue-specific enrichment in GWAS  
267 signal. The correlation coefficients between the coefficient Z-scores and sample sizes were 0.6453  
268 ( $p=2.253 \times 10^{-6}$ ) and 0.4247 ( $p=0.004$ ) for schizophrenia and rheumatoid arthritis, respectively.

269

### 270 **Enrichment of the intersection between eQTLs and histone marks**

271 We interrogated the intersection of eQTLs and histone marks found in specific CNS and immune cells,  
272 and estimated the enrichment of the intersection in its effect on rheumatoid arthritis and  
273 schizophrenia. We found significant enrichment in GWAS signal for eQTLs that intersect with  
274 histones that bare modification H3K4me1, a modification thought to be present in the enhancer of  
275 actively transcribed genes (Zhou et al. 2011; Allis and Jenuwein 2016), in CNS cells for schizophrenia  
276 (see Figure 3). There was some evidence for significant enrichment of eQTLs that intersected with  
277 genomic regions in immune cells baring the H3K4me1 mark in their effect on schizophrenia, but not  
278 on rheumatoid arthritis. Specifically, none of the intersecting annotations showed evidence of  
279 enrichment for rheumatoid arthritis. For the separate annotations, we found significant enrichment  
280 in GWAS signal across all histone marks found in CNS cells and three significant immune cell-types

281 that bare the H3K4me3 modification, a modification associated with transcriptional start sites and  
282 promoters of actively transcribed genes (Zhou et al. 2011; Allis and Jenuwein 2016), for  
283 schizophrenia (S6 Figure). The opposite picture was seen for rheumatoid arthritis: a wide variety of  
284 immune-cell specific histone marks showed significant enrichments in GWAS signal, while all marks  
285 found in CNS cells were below zero. The union of GTEx eQTLs reached statistical significance for all  
286 models (S6 Figure).

287

## 288 Discussion

289 Stratified Linkage Disequilibrium Score Regression provides a way to partition  $h^2_{\text{SNP}}$  into parts  
290 explained by (functional) parts of the genome (Finucane et al. 2015). A “full baseline model”  
291 containing 24 non-cell-type-specific annotations of SNPs, such as SNPs located in promoters or  
292 coding regions, was developed previously for analysis using SLDSR. Here, we added annotations  
293 containing eQTLs derived from whole blood and brain tissue into the model, and showed that eQTLs  
294 were substantially stronger enriched in their effect on complex traits compared to all categories  
295 considered by Finucane *et al* (2015). The complete brain eQTL annotation was significantly enriched  
296 in GWAS signal for educational attainment, rheumatoid arthritis, smoking behavior, and  
297 schizophrenia. This finding is consistent with previous estimates of eQTL effect enrichment (Davis et  
298 al. 2013). Considerable enrichment for eQTLs, even for traits not apparently linked to the brain or  
299 immune system (e.g. smoking behavior), suggested that non-trivial eQTL overlap across tissues  
300 might be present.

301 Inclusion of both brain and blood eQTLs into the SLDSR model did not separate the signal  
302 into tissue-specific effects. In general, we are not able to clearly identify tissue-specific eQTL signals  
303 using these datasets and SLDSR. Our second analysis of eQTL enrichment based on 44 tissue-specific  
304 *cis*-eQTL sets, obtained from the GTEx consortium (2015; Aguet et al. 2016), confirms the lack of  
305 tissue-specific eQTL enrichment. While an annotation containing all eQTLs identified in GTEx is  
306 significantly enriched in its effect on schizophrenia and rheumatoid arthritis ( $Z=5.501$  and  $Z=3.802$ ,

307 respectively, both  $p < 0.001$ ), none of the analyzed brain tissues are enriched beyond all eQTLs in  
308 their effect on schizophrenia. Similarly, whole blood eQTLs are not significantly enriched beyond all  
309 GTEx eQTLs taken together in their effect on rheumatoid arthritis. Again, these findings are not  
310 consistent with the hypothesis of abundant tissue-specific *cis*-eQTLs with effects on complex traits  
311 related to the specific tissue in question. Especially, when contrasted with tissue-specific gene  
312 expression levels and tissue-specific histone modifications (Liu et al. 2016; Finucane et al. 2017),  
313 tissue-specific eQTLs are of limited value in relating complex traits to a tissue. Our conclusions are  
314 limited to *cis*-eQTLs and it is not unlikely that *trans*-eQTLs behave differently in terms of tissue-  
315 specificity. We do, find evidence for possible enrichment for eQTLs that intersect with tissue-specific  
316 H3K4me1 histone marks in the brain, but also immune cells, in their effect on schizophrenia but not  
317 rheumatoid arthritis. This means that eQTLs in H3k4me1 marks are enriched in their effect on  
318 schizophrenia above the expected enrichment based on the fact that these SNPs are both eQTLs and  
319 located in H3K4me1 histone marks. What is of substantial interest is that the enrichment in GWAS  
320 signal appears specific to H3K4me1 marks, and no other histone marks, suggesting that these marks  
321 specifically can aid in prioritizing genomic regions in which tissue-specific eQTLs may reside. Though,  
322 again, the totality of evidence is inconclusive on the relevance of tissue-specific eQTLs to variation in  
323 complex traits.

324 Our results are consistent with, and complimentary to, a study investigating the genetic  
325 correlation between gene expression levels across 15 tissues (Liu et al. 2016). This study revealed  
326 substantial correlations between *cis*-genetic effects on gene expression across 15 tissues (Liu et al.  
327 2016). Our analyses confirmed the value of using whole blood as discovery tissue for detection of  
328 *cis*-eQTLs and further demonstrated the usefulness of techniques that use *cis*-eQTLs discovered in  
329 whole blood to study the etiology of complex traits related to different tissues (Gamazon et al. 2015;  
330 Gusev et al. 2016). The results presented here highlight the overlap of *cis*-eQTL effects across tissues  
331 on a genome-wide level. However, the effect of a *cis*-eQTL might vary substantially across tissues for  
332 individual genes (Grundberg et al. 2012). Our conclusions are based on genome-wide enrichments

333 and therefore should not be interpreted as limited evidence for tissue-specific eQTL effects for  
334 individual genes. Therefore, eQTL discovery in the tissue most relevant to a specific trait or disorder  
335 remains important to further our understanding of the genetic regulation of tissue-specific gene  
336 expression. What is also clear is that, to discover those tissue-specific eQTLs that are of relevance to  
337 the interpretation of GWAS of complex traits, tissue-specific eQTL discovery needs to be refined. The  
338 practice of, as a post-hoc analysis to GWAS, performing eQTL lookup in a specific tissue linked to a  
339 trait, when larger dataset for other accessible tissues are available, may be suboptimal. In fact, one  
340 may prefer to perform a lookup in the overlap between histone modifications in a relevant tissue  
341 and eQTLs regardless of tissue. One can further consider utilizing eQTLs to link GWAS findings to a  
342 gene, and subsequently consider the differential expression of a gene to identify the tissue in which  
343 the gene is most likely to act in effecting the trait. Tissue-specific differential gene expression vastly  
344 outperforms eQTLs in tagging regions of the genome enriched in their effect on complex traits  
345 (Finucane et al. 2017).

346 It is also evident that a limited dichotomous definition of eQTL/no-eQTL may be insufficient  
347 to identify tissue-specific eQTL effects. An evident improvement would be to compute the *difference*  
348 in eQTL effect on expression of the gene between tissues, and perform inference based on this  
349 difference in effect. eQTLs are strongly enriched SNPs, with clear biological function and utility for  
350 the translation of GWAS findings, though tissue-specific eQTL mechanisms remain elusive. The  
351 discovery of tissue-specific eQTL effects, which can aid in linking complex trait to tissue, may require  
352 novel research strategies.

353

## 354 **Supplemental Data**

355 Supplemental Data includes 2 figures and 4 tables

356

## 357 **Compliance with Ethical Standards**

## 358 **Funding**

359 MGN is supported by the Royal Netherlands Academy of Science Professor Award (PAH/6635) to DIB.  
360 HFI is supported by the “Aggression in Children: Unraveling gene-environment interplay to inform  
361 Treatment and InterventiON strategies” (ACTION) project. ACTION receives funding from the  
362 European Union Seventh Framework Program (FP7/2007-2013) under grant agreement no 602768.  
363 MB is supported by a University Research Chair of the Vrije Universiteit. The discovery of blood eQTL  
364 was funded by the US National Institute of Mental Health (RC2 MH089951, principal Investigator PFS)  
365 as part of the American Recovery and Reinvestment Act of 2009. We thank T. Lehner (National  
366 Institute of Mental Health) for his support. We acknowledge Hillary Finucane, Raymond Walters and  
367 Benjamin Neale for critical comments on our methods, design and manuscript.

368

## 369 **Conflict of Interest**

370 The authors declare that they have no conflict of interest

371

## 372 **Ethical approval**

373 This article does not contain any studies with human participants or animals performed by any of the  
374 authors.

375

## 376 **Web Resources**

377 Age at menarche summary statistics, [www.reprogen.org/data\\_download.html](http://www.reprogen.org/data_download.html)

378 Blood eQTLs, <https://eqtl.onderzoek.io/>

379 Brain eQTLs, <http://www.braineac.org/>

380 Coronary artery disease summary statistics, [www.cardiogramplusc4d.org/data-downloads/](http://www.cardiogramplusc4d.org/data-downloads/)

381 Crohn’s disease and ulcerative colitis summary statistics, [www.ibdgenetics.org/downloads.html](http://www.ibdgenetics.org/downloads.html)

382 Educational attainment summary statistics, <http://www.thessgac.org/data>

- 383 Full baseline model LD scores, <http://data.broadinstitute.org/alkesgroup/LDSCORE/>
- 384 GTEx dataset, <http://www.gtexportal.org/home/datasets>
- 385 Height and BMI summary statistics,  
386 [www.broadinstitute.org/collaboration/giant/index.php/GIANT\\_consortium\\_data\\_files](http://www.broadinstitute.org/collaboration/giant/index.php/GIANT_consortium_data_files)
- 387 LDL levels summary statistics, [www.broadinstitute.org/mpg/pubs/lipids2010/](http://www.broadinstitute.org/mpg/pubs/lipids2010/)
- 388 Rheumatoid arthritis summary statistics, <http://plaza.umin.ac.jp/yokada/datasource/software.htm>
- 389 Schizophrenia and smoking behavior summary statistics, [www.med.unc.edu/pgc/results-and-](http://www.med.unc.edu/pgc/results-and-downloads)  
390 [downloads](http://www.med.unc.edu/pgc/results-and-downloads)
- 391 SLDSR software, <https://github.com/bulik/ldsc/>
- 392



## 393 **References**

- 394 Aguet F, Brown AA, Castel S, et al (2016) Local genetic effects on gene expression across 44 human  
395 tissues. bioRxiv. doi: <https://doi.org/10.1101/074450>
- 396 Allen HL, Estrada K, Lettre G, et al (2010) Hundreds of variants clustered in genomic loci and  
397 biological pathways affect human height. *Nature* 467:832–838.
- 398 Allis CD, Jenuwein T (2016) The molecular hallmarks of epigenetic control. *Nat Rev Genet* 17:487–  
399 500.
- 400 Andreassen OA, Harbo HF, Wang Y, et al (2015) Genetic pleiotropy between multiple sclerosis and  
401 schizophrenia but not bipolar disorder: differential involvement of immune-related gene loci.  
402 *Mol Psychiatry* 20:207–14. doi: 10.1038/mp.2013.195
- 403 Boomsma DI, Willemsen G, Sullivan PF, et al (2008) Genome-wide association of major depression:  
404 description of samples for the GAIN Major Depressive Disorder Study: NTR and NESDA biobank  
405 projects. *Eur J Hum Genet* 16:335–342. doi: 10.1038/sj.ejhg.5201979
- 406 Brem RB, Yvert G, Clinton R, Kruglyak L (2002) Genetic dissection of transcriptional regulation in  
407 budding yeast. *Science* 296:752–5. doi: 10.1126/science.1069516
- 408 Bulik-Sullivan BK, Finucane HK (2015) LD Score Estimation Tutorial.  
409 <https://github.com/bulik/ldsc/wiki/LD-Score-Estimation-Tutorial>. Accessed 21 Nov 2015
- 410 Bulik-Sullivan BK, Loh P-R, Finucane HK, et al (2015) LD Score regression distinguishes confounding  
411 from polygenicity in genome-wide association studies. *Nat Genet* 47:291–295. doi:  
412 10.1038/ng.3211
- 413 Davis LK, Yu D, Keenan CL, et al (2013) Partitioning the heritability of Tourette syndrome and  
414 obsessive compulsive disorder reveals differences in genetic architecture. *PLoS Genet*  
415 9:e1003864. doi: 10.1371/journal.pgen.1003864
- 416 Ding J, Gudjonsson JE, Liang L, et al (2010) Gene expression in skin and lymphoblastoid cells: Refined  
417 statistical method reveals extensive overlap in cis-eQTL signals. *Am J Hum Genet* 87:779–89.  
418 doi: 10.1016/j.ajhg.2010.10.024

- 419 Finucane H, Reshef Y, Anttila V, et al (2017) Heritability enrichment of specifically expressed genes  
420 identifies disease-relevant tissues and cell types.
- 421 Finucane HK, Bulik-Sullivan B, Gusev A, et al (2015) Partitioning heritability by functional annotation  
422 using genome-wide association summary statistics. *Nat Genet* 47:1228–1235. doi:  
423 10.1038/ng.3404
- 424 Furberg H, Kim Y, Dackor J, et al (2010) Genome-wide meta-analyses identify multiple loci associated  
425 with smoking behavior. *Nat Genet* 42:441–7. doi: 10.1038/ng.571
- 426 Gamazon ER, Wheeler HE, Shah KP, et al (2015) A gene-based association method for mapping traits  
427 using reference transcriptome data. *Nat Genet* 47:1091–1098. doi: 10.1038/ng.3367
- 428 Grundberg E, Small KS, Hedman ÅK, et al (2012) Mapping cis- and trans-regulatory effects across  
429 multiple tissues in twins. *Nat Genet* 44:1084–9. doi: 10.1038/ng.2394
- 430 GTEx Consortium (2015) The Genotype-Tissue Expression (GTEx) pilot analysis: Multitissue gene  
431 regulation in humans. *Science* (80- ) 348:648–660.
- 432 Gusev A, Ko A, Shi H, et al (2016) Integrative approaches for large-scale transcriptome-wide  
433 association studies. *Nat Genet* 48:245–252. doi: 10.1038/ng.3506
- 434 Hernandez DG, Nalls MA, Moore M, et al (2012) Integration of GWAS SNPs and tissue specific  
435 expression profiling reveal discrete eQTLs for human traits in blood and brain. *Neurobiol Dis*  
436 47:20–8. doi: 10.1016/j.nbd.2012.03.020
- 437 Hirschhorn JN, Daly MJ (2005) Genome-wide association studies for common diseases and complex  
438 traits. *Nat Rev Genet* 6:95–108. doi: 10.1038/nrg1521
- 439 Jansen R, Hottenga J-J, Nivard MG, et al (2017) Conditional eQTL Analysis Reveals Allelic  
440 Heterogeneity of Gene Expression. *Hum Mol Genet*. doi: 10.1093/hmg/ddx043
- 441 Jostins L, Ripke S, Weersma RK, et al (2012) Host-microbe interactions have shaped the genetic  
442 architecture of inflammatory bowel disease. *Nature* 491:119–124.
- 443 Karalis KP, Giannogonas P, Kodela E, et al (2009) Mechanisms of obesity and related pathology:  
444 linking immune responses to metabolic stress. *FEBS J* 276:5747–5754.

- 445 Liu X, Finucane HK, Gusev A, et al (2016) Functional partitioning of local and distal gene expression  
446 regulation in multiple human tissues. *bioRxiv* 46383. doi: 10.1101/046383
- 447 Lowe WL, Reddy TE (2015) Genomic approaches for understanding the genetics of complex disease.  
448 *Genome Res* 25:1432–1441. doi: 10.1101/gr.190603.115
- 449 Manolio TA, Collins FS, Cox NJ, et al (2009) Finding the missing heritability of complex diseases.  
450 *Nature* 461:747–53. doi: 10.1038/nature08494
- 451 Morley M, Molony CM, Weber TM, et al (2004) Genetic analysis of genome-wide variation in human  
452 gene expression. *Nature* 430:743–7. doi: 10.1038/nature02797
- 453 Nica AC, Parts L, Glass D, et al (2011) The architecture of gene regulatory variation across multiple  
454 human tissues: the MuTHER study. *PLoS Genet* 7:e1002003. doi:  
455 10.1371/journal.pgen.1002003
- 456 Nicolae DL, Gamazon E, Zhang W, et al (2010) Trait-associated SNPs are more likely to be eQTLs:  
457 annotation to enhance discovery from GWAS. *PLoS Genet* 6:e1000888. doi:  
458 10.1371/journal.pgen.1000888
- 459 Okada Y, Wu D, Trynka G, et al (2014) Genetics of rheumatoid arthritis contributes to biology and  
460 drug discovery. *Nature* 506:376–381.
- 461 Penninx BWJH, Beekman ATF, Smit JH, et al (2008) The Netherlands Study of Depression and Anxiety  
462 (NESDA): rationale, objectives and methods. *Int J Methods Psychiatr Res* 17:121–140.
- 463 Perry JRB, Day F, Elks CE, et al (2014) Parent-of-origin-specific allelic associations among 106 genomic  
464 loci for age at menarche. *Nature* 514:92–97.
- 465 Ramasamy A, Trabzuni D, Guelfi S, et al (2014) Genetic variability in the regulation of gene expression  
466 in ten regions of the human brain. *Nat Neurosci* 17:1418–28. doi: 10.1038/nn.3801
- 467 Rietveld CA, Medland SE, Derringer J, et al (2013) GWAS of 126,559 individuals identifies genetic  
468 variants associated with educational attainment. *Science* (80- ) 340:1467–1471.
- 469 Ripke S, Neale BM, Corvin A, et al (2014) Biological insights from 108 schizophrenia-associated  
470 genetic loci. *Nature* 511:421–427. doi: 10.1038/nature13595

- 471 Ripke S, Wray NR, Lewis CM, et al (2013) A mega-analysis of genome-wide association studies for  
472 major depressive disorder. *Mol Psychiatry* 18:497–511. doi: 10.1038/mp.2012.21
- 473 Schunkert H, König IR, Kathiresan S, et al (2011) Large-scale association analysis identifies 13 new  
474 susceptibility loci for coronary artery disease. *Nat Genet* 43:333–338.
- 475 Speliotes EK, Willer CJ, Berndt SI, et al (2010) Association analyses of 249,796 individuals reveal 18  
476 new loci associated with body mass index. *Nat Genet* 42:937–948.
- 477 Teslovich TM, Musunuru K, Smith A V, et al (2010) Biological, clinical and population relevance of 95  
478 loci for blood lipids. *Nature* 466:707–713.
- 479 Torres JM, Gamazon ER, Parra EJ, et al (2014) Cross-tissue and tissue-specific eQTLs: partitioning the  
480 heritability of a complex trait. *Am J Hum Genet* 95:521–34. doi: 10.1016/j.ajhg.2014.10.001
- 481 Vimalaswaran KS, Tachmazidou I, Zhao JH, et al (2012) Candidate genes for obesity-susceptibility  
482 show enriched association within a large genome-wide association study for BMI. *Hum Mol*  
483 *Genet* 21:4537–42. doi: 10.1093/hmg/dds283
- 484 Vink JM, Jansen R, Brooks A, et al (2015) Differential gene expression patterns between smokers and  
485 non-smokers: cause or consequence?
- 486 Visscher PM, Brown MA, McCarthy MI, Yang J (2012) Five Years of GWAS Discovery. *Am J Hum Genet*  
487 90:7–24. doi: 10.1016/j.ajhg.2011.11.029
- 488 Wright FA, Sullivan PF, Brooks AI, et al (2014) Heritability and genomics of gene expression in  
489 peripheral blood. *Nat Genet* 46:430–437. doi: 10.1038/ng.2951
- 490 Zhou VW, Goren A, Bernstein BE (2011) Charting histone modifications and the functional  
491 organization of mammalian genomes. *Nat Rev Genet* 12:7–18.

492

### 493 **Figure Titles and Legends**

494 **Figure 1. Average enrichment in GWAS signal of the 24 baseline annotations, 4 brain eQTL**  
495 **annotations and 4 blood eQTL annotations.**

496 Bar plot of the average enrichment in GWAS signal across all traits for the 24 main baseline  
497 annotations and 8 main eQTL annotations. Grey beans represent the baseline categories. Blue beans  
498 represent eQTLs. Black bars indicate average enrichment. Boxes show upper- and lower-bounds of  
499 the 95% confidence interval of the mean. Red dots show enrichments for immune-related traits.  
500 Horizontal red line indicates enrichment of 1, i.e. no enrichment.

501

## 502 **Figure 2. Coefficient Z-scores of the 45 GTEx annotations**

503 Barplot of coefficient z-scores for all GTEx annotations for schizophrenia (grey) and rheumatoid  
504 arthritis (red). Bars are sorted from highest to lowest based on the results from schizophrenia.  
505 Horizontal dotted line indicates Bonferroni threshold for 45 tests. Two asterisks indicate bars passing  
506 Bonferroni correction for multiple testing.

507

## 508 **Figure 3. Coefficient Z-score of intersection between union of GTEx eQTLs and cell-type-specific** 509 **histone marks**

510 Top two graphs show coefficient Z-scores for schizophrenia. Bottom two graphs show the same for  
511 rheumatoid arthritis. Grey bars indicate histone marks found in cells from the central nervous  
512 system. Red bars represent histone marks found in cells from the immune system. From dark to light,  
513 shades of the bars indicate histone marks H3K27ac, H3K4me1, H3K4me3, and H3K9ac. Vertical  
514 dotted lines indicate separation between histone marks. One asterisk above the bars indicate  
515 annotations passing FDR correction for multiple testing. Two asterisks indicate bars passing  
516 Bonferroni correction for multiple testing. Horizontal dotted line indicates Bonferroni threshold for  
517 101 tests.

518

519

## 520 **Tables**

521 **Table I. (see attachments)**

# blood\_brain

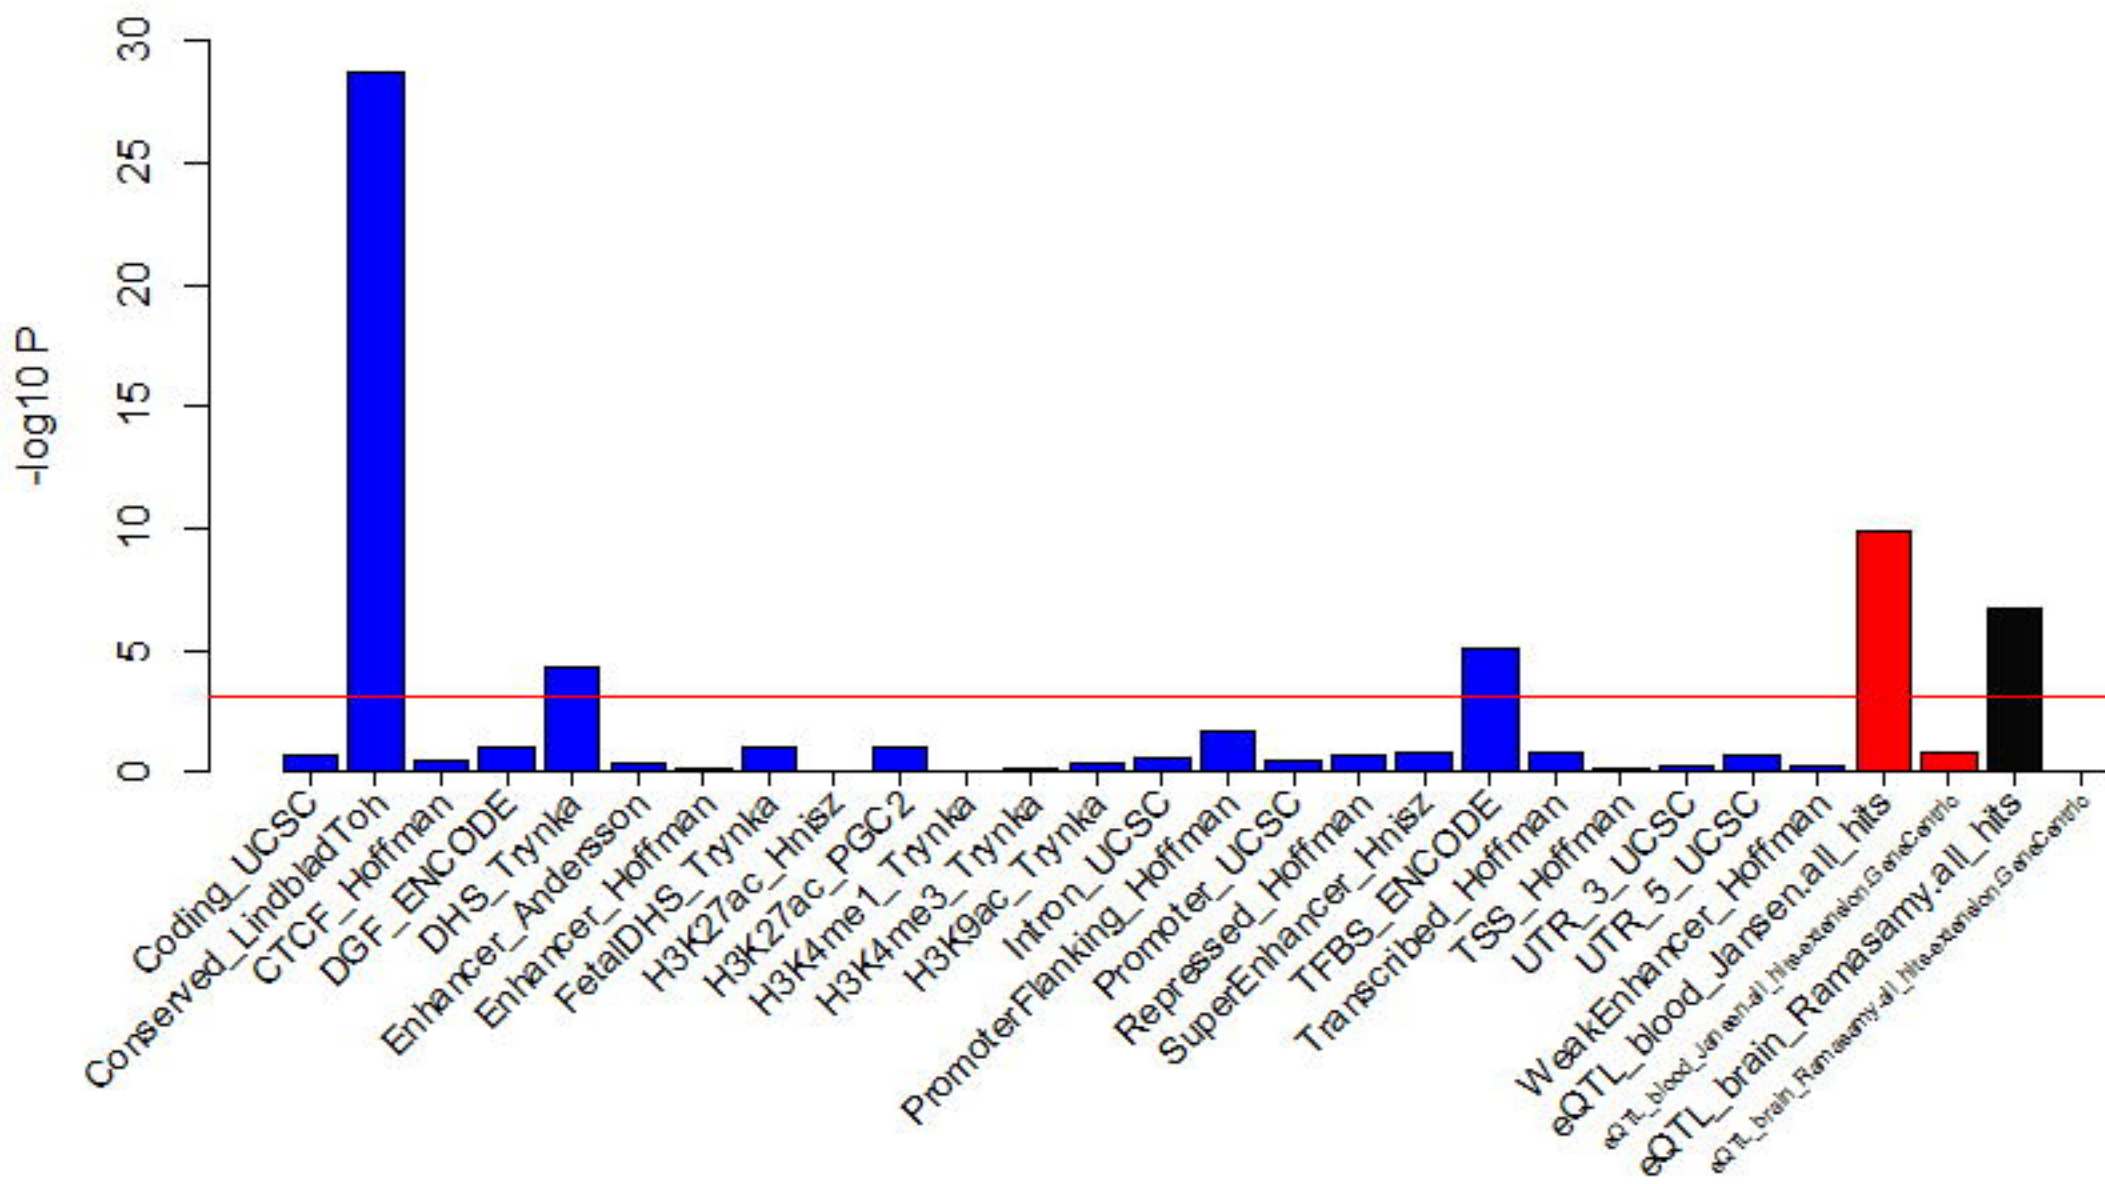

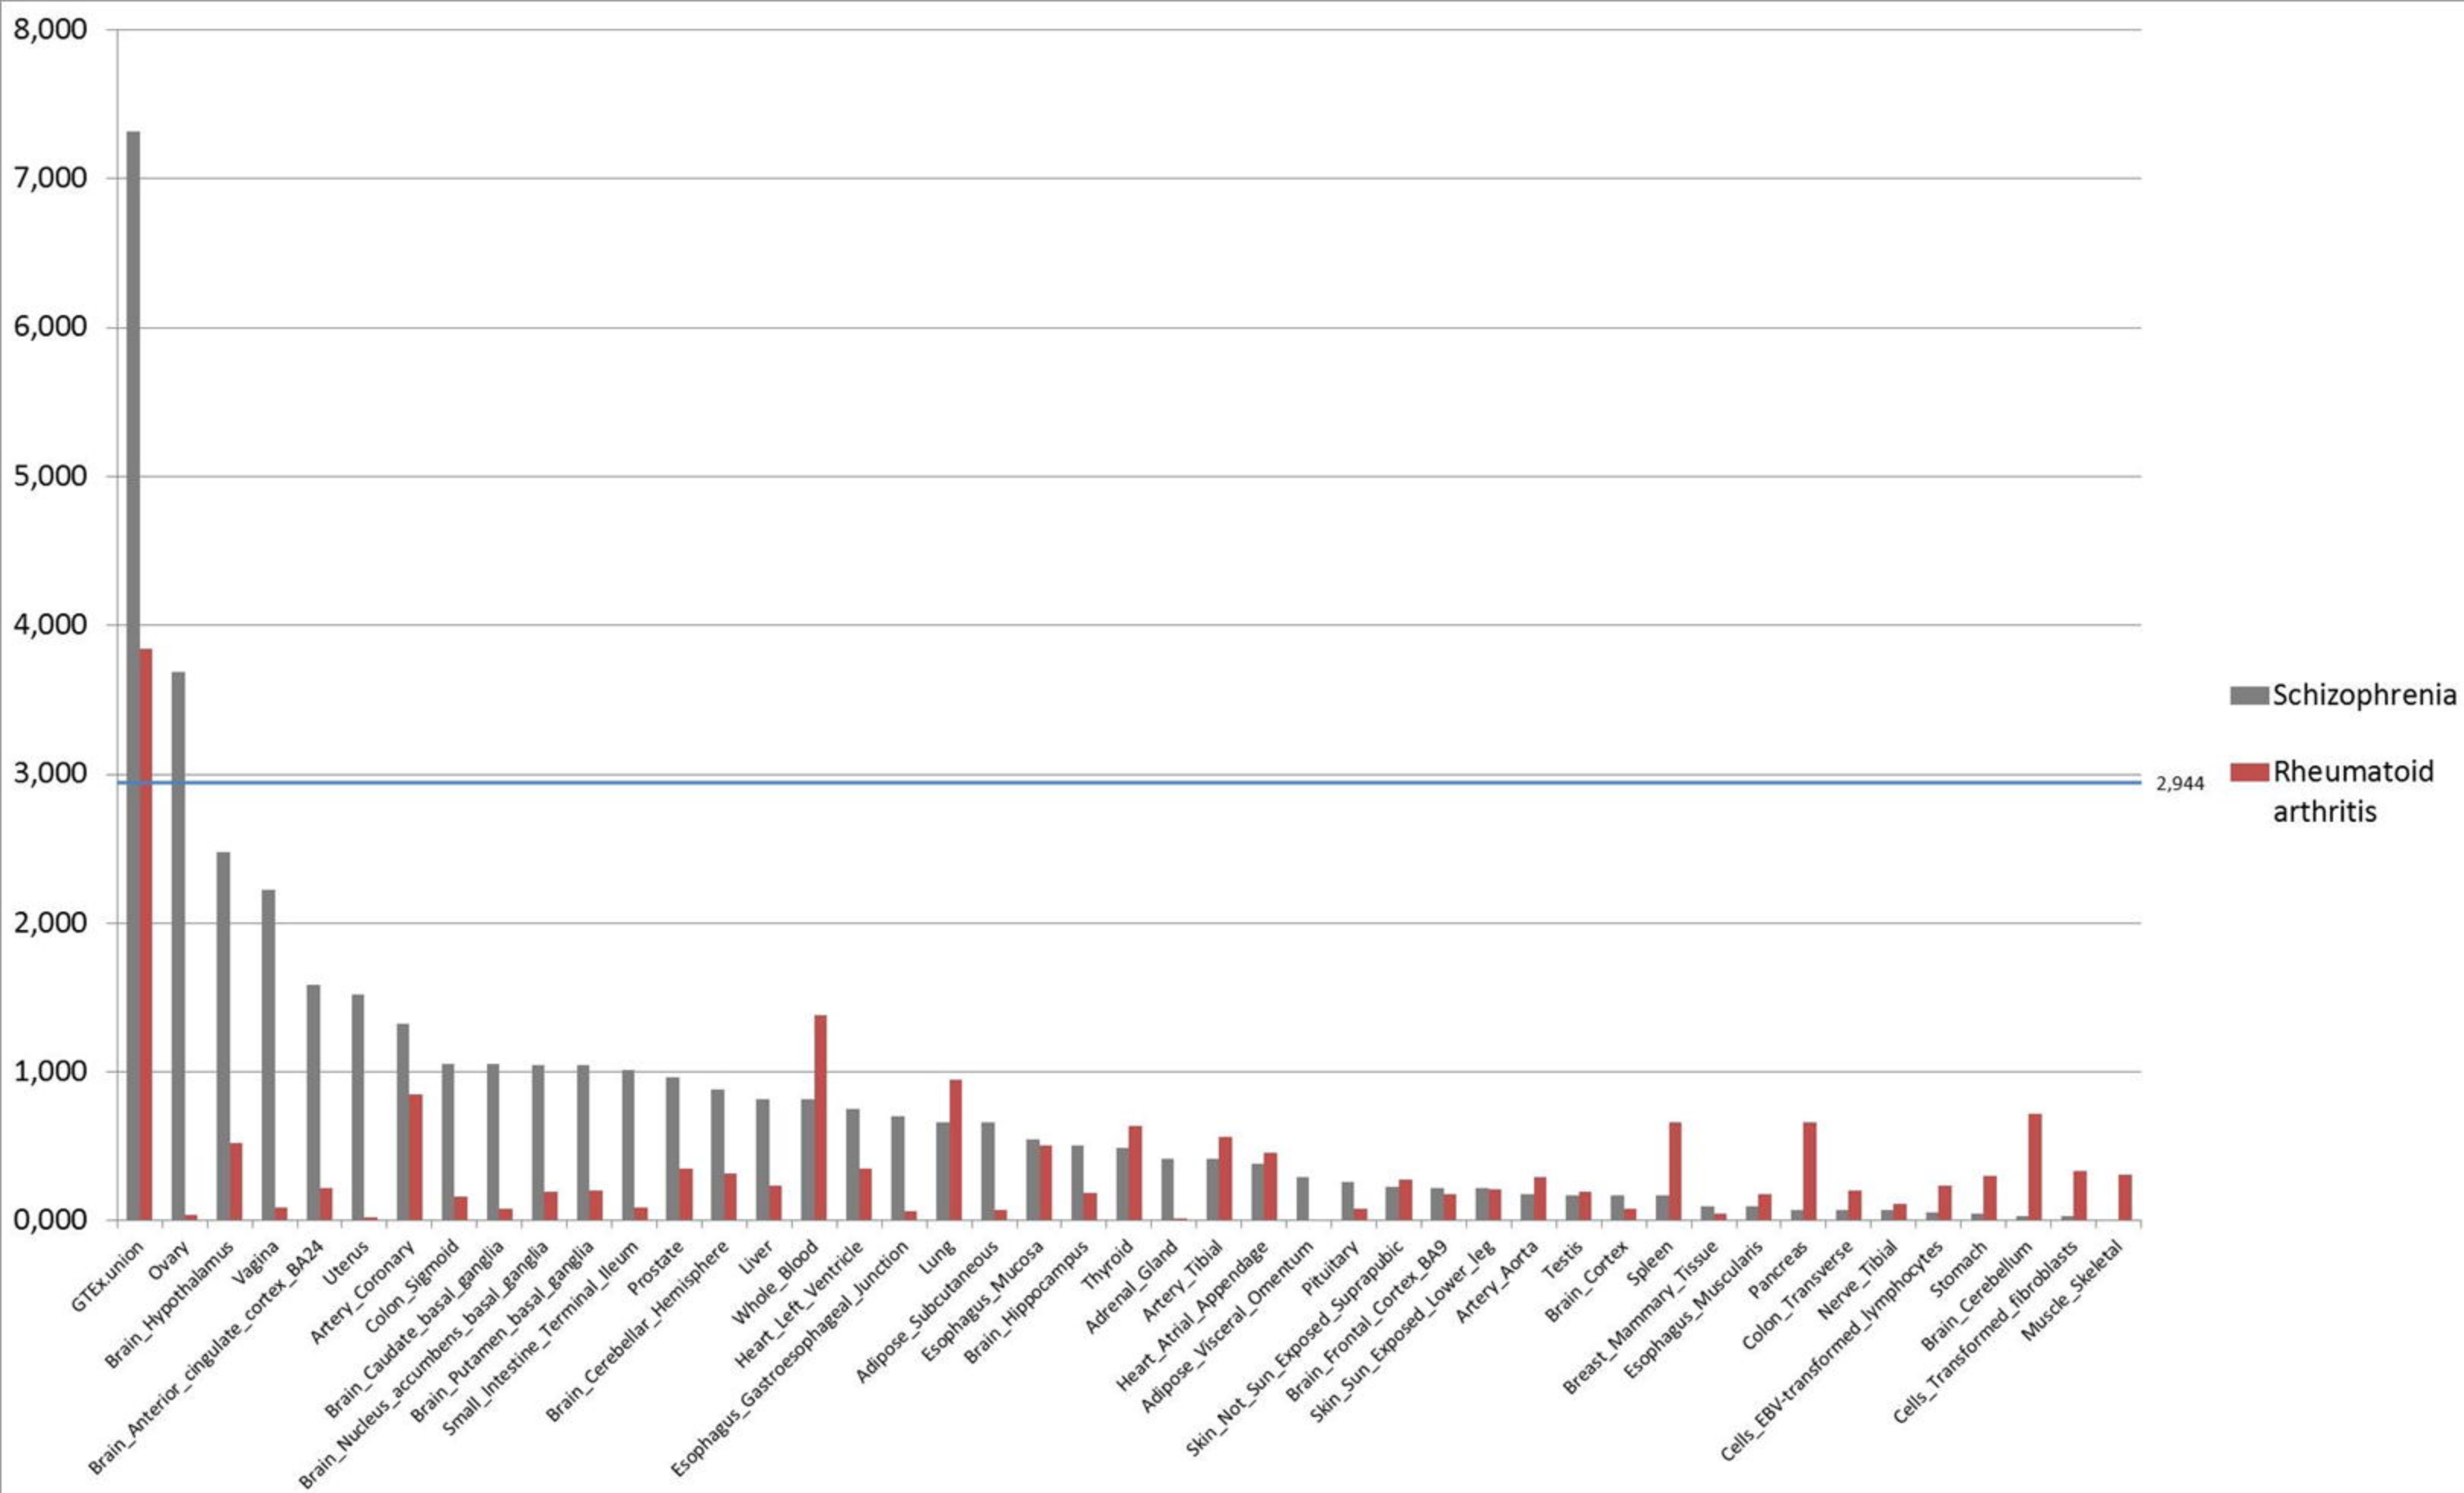

Source: http://biorxiv.org/content/10.1101/107482v2.full.pdf
